# Supplementary material for: Co-Carbonized Waste Polythene/Sugarcane Bagasse Nanocomposite for Aqueous Environmental Remediation Applications
Source: MDPI journal article supplement (doi:10.3390/nano13071193), 2023-03-27
Supplement: s1 [file s1]

**Supplementary Information**

# **Co-carbonized Waste Polythene/Sugarcane Bagasse Nanocomposite for Aqueous Environmental Remediation Applications**

**Moonis Ali Khan <sup>1,\*</sup>, Ayoub Abdullah Alqadami <sup>1</sup>, Saikh Mohammad Wabaidur <sup>1</sup> and Byong-Hun Jeon <sup>2</sup>**

<sup>1</sup> Chemistry Department, College of Science, King Saud University, Riyadh 11451, Saudi Arabia

<sup>2</sup> Department of Earth Resources and Environmental Engineering, Hanyang University, Seoul 04763, the Republic of Korea

\* Correspondence: mokhan@ksu.edu.sa or moonisalikh@gmail.com

---

**Table of contents**

| <b>Index</b> | <b>Caption</b>                                                                                                                             |
|--------------|--------------------------------------------------------------------------------------------------------------------------------------------|
| Text S1      | Adsorption isotherm models used.                                                                                                           |
| Text S2      | Adsorption kinetic models used.                                                                                                            |
| Figure S1    | TEM images of SBPE (a), and SBPEAC (b) composites.                                                                                         |
| Figure S2    | Non-linear isotherm models for MG adsorption on SBPE at 298 K (a), 308 K (b), 318 K (c), and on SBPEAC at (d) 298 K, (e) 308 K, (f) 318 K. |
| Figure S3    | Non-linear kinetic models for MG adsorption on SBPE (a), and SBPEAC (b) composites.                                                        |
| Figure S4    | Van't Hoff plots for MG adsorption on SBPE (a), and SBPEAC (b) composites.                                                                 |

**Text S1.**

Non-linear forms of Langmuir [63] (Equation (S1)) and Freundlich [64] (Equation (S2)), and Dubinin–Radushkevich (D-R) (Equations (S3) – (S5)) [65] isotherm models were applied to analyze the experimental data.

$$q_e = \frac{q_m K_L C_e}{1 + K_L C_e} \quad (S1)$$

$$q_e = K_F C_e^{1/n} \quad (S2)$$

$$q_e = q_s e^{-K_{DR} \varepsilon^2} \quad (S3)$$

$$\varepsilon = RT \ln \left( 1 + \frac{1}{C_e} \right) \quad (S4)$$

$$E = \frac{1}{\sqrt{2K_{DR}}} \quad (S5)$$

where,  $K_L$  (L/mg),  $K_F$  (mg/g)(L/mg)<sup>1/n</sup>, and  $n$  are Langmuir constant, Freundlich constant, and degree of the adsorption process, respectively.  $C_e$  (mg/L) is the MG concentration at equilibrium,  $q_e$  (mg/g) is the amount of MG adsorbed onto SBPE and SBPEAC composites at equilibrium;  $Q_m$  (mg/g) is the maximum adsorption capacity;  $q_s$  (mg/g) is the adsorption capacity;  $K_{DR}$  (mol<sup>2</sup>/kJ<sup>2</sup>) is the constant related to the sorption energy;  $\varepsilon$  is the Polanyi potential; and  $E$  (kJ/mol) is the mean adsorption energy.

**Text S2.**

Non-linear pseudo-first order [69] (Equation (S6)), pseudo-second-order (Equation (S7)) [69], and Elovich models (Equation (S8)) [70] were used to investigate the reaction mechanism and rate of MG adsorption on SBPE and SBPEAC composites.

$$q_t = q_e(1 - e^{-K_1 t}) \quad (S6)$$

$$q_t = \frac{q_e^2 k_2 t}{1 + q_e k_2 t} \quad (S7)$$

$$q_t = \frac{1}{\beta} \ln(1 + \alpha \beta t) \quad (S8)$$

where,  $k_1$  (1/min), and  $k_2$  (g/mg min) are the rate constants for pseudo- first-order and pseudo-second-order models, respectively;  $q_t$  and  $q_e$  are the amounts of MG adsorbed at time  $t$  and equilibrium, respectively;  $\alpha$  (mg/g-min) is the initial adsorption rate;  $\beta$  (mg/g) is the desorption constant during any one experiment.

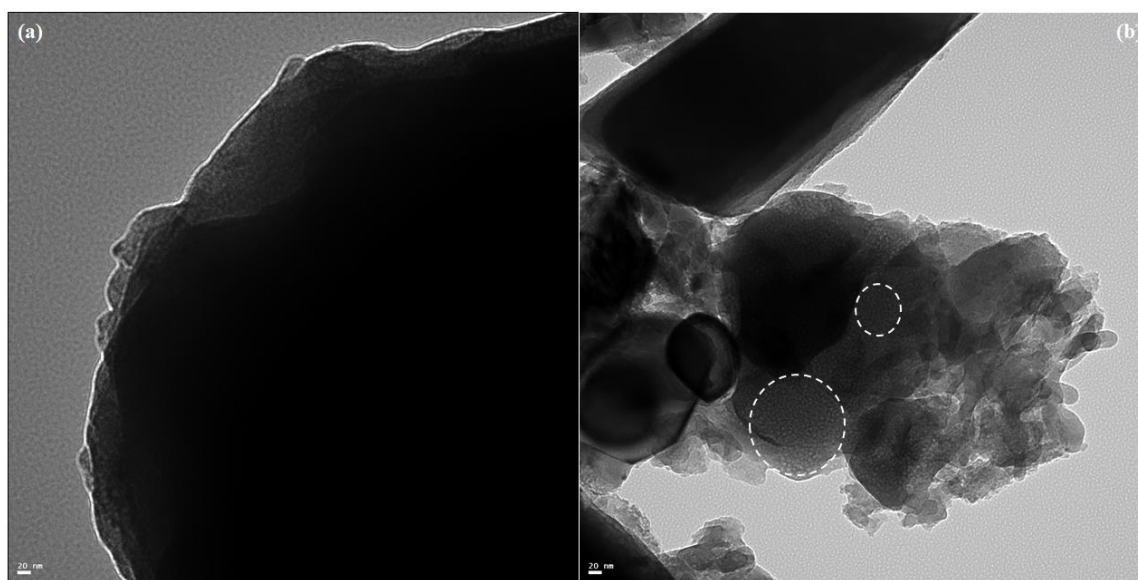

**Figure S1.** TEM images of SBPE (a), and SBPEAC (b) composites.

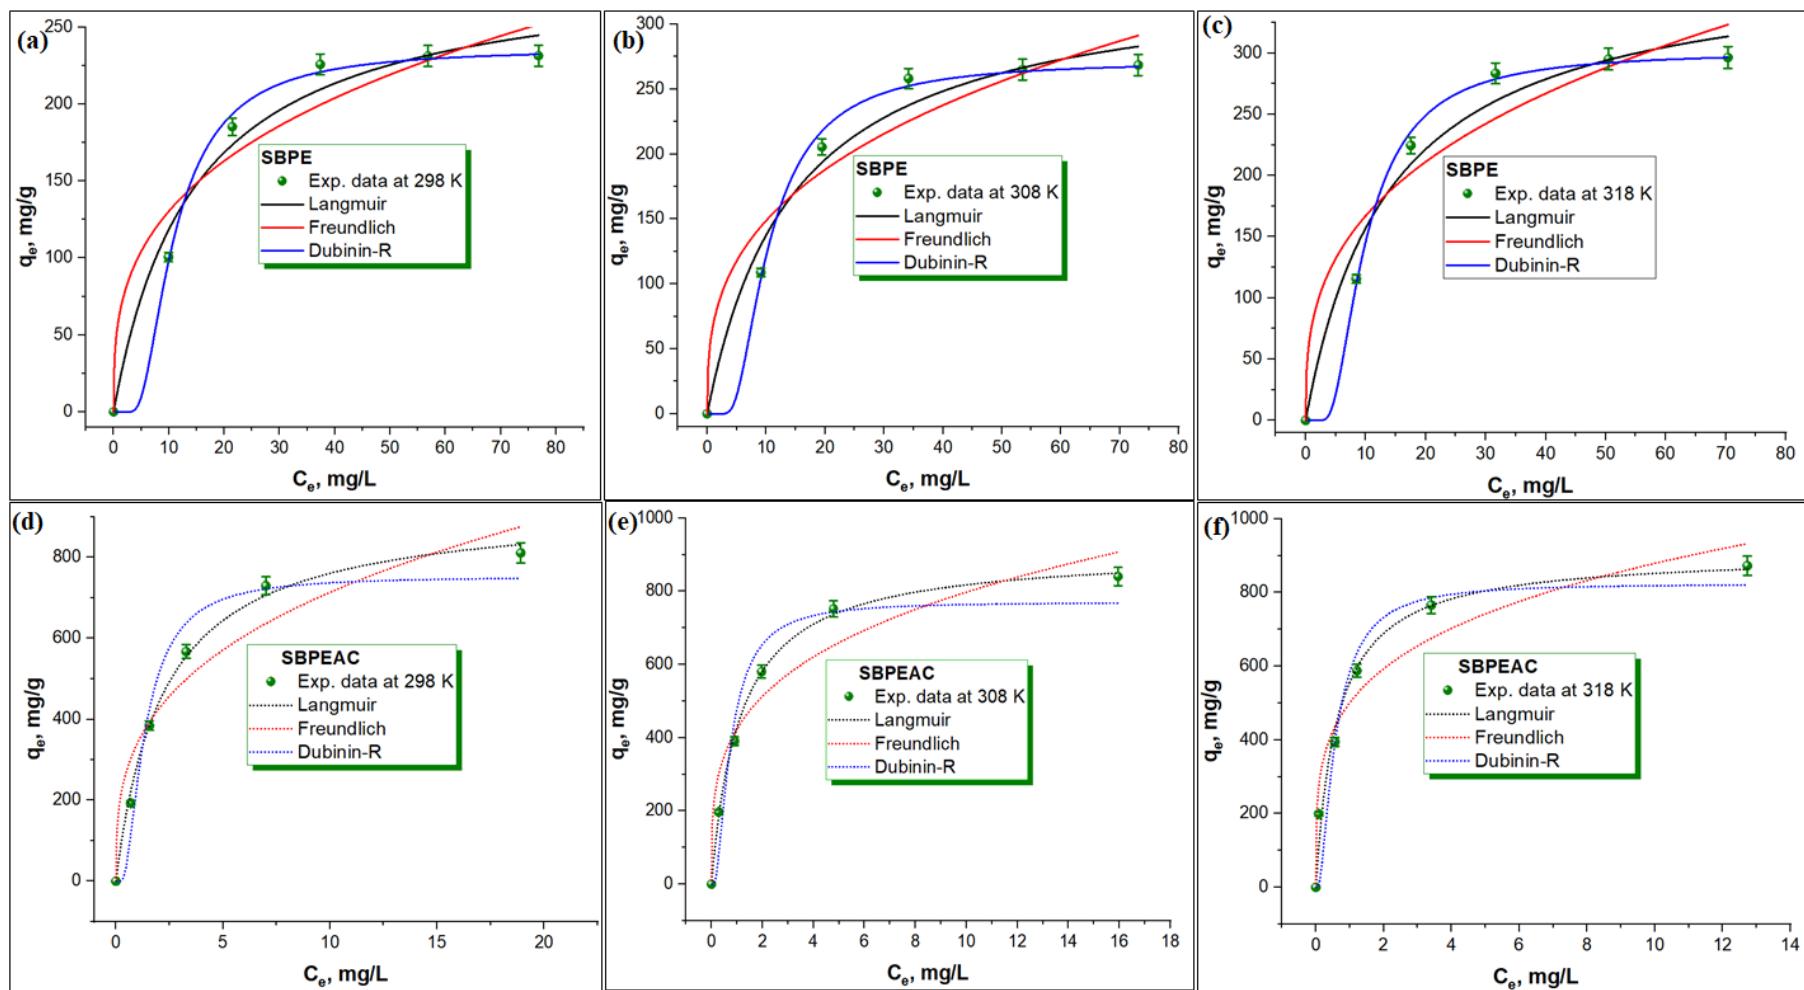

**Figure S2.** Non-linear isotherm models for MG adsorption on SBPE at 298 K (a), 308 K (b), 318 K (c), and on SBPEAC at (d) 298 K, (e) 308 K, (f) 318 K.

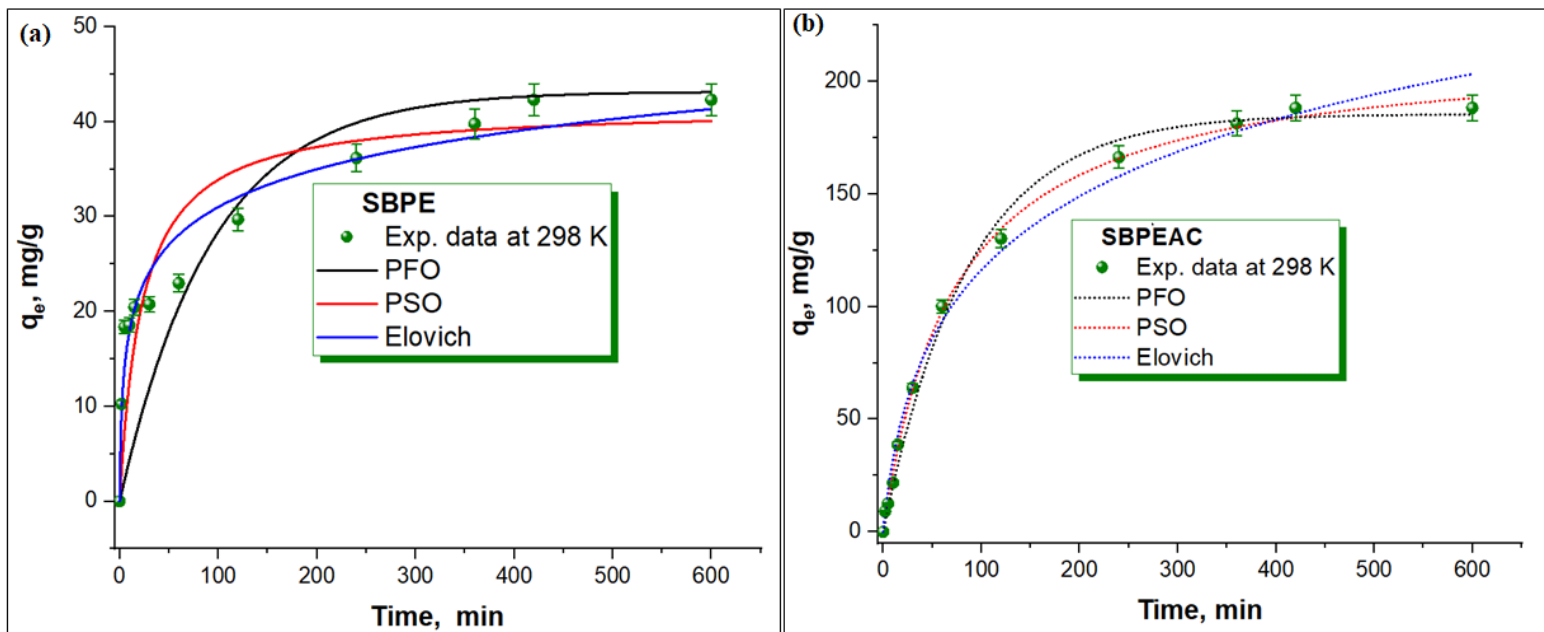

**Figure S3.** Non-linear kinetic models for MG adsorption on SBPE (a), and SBPEAC (b) composites.

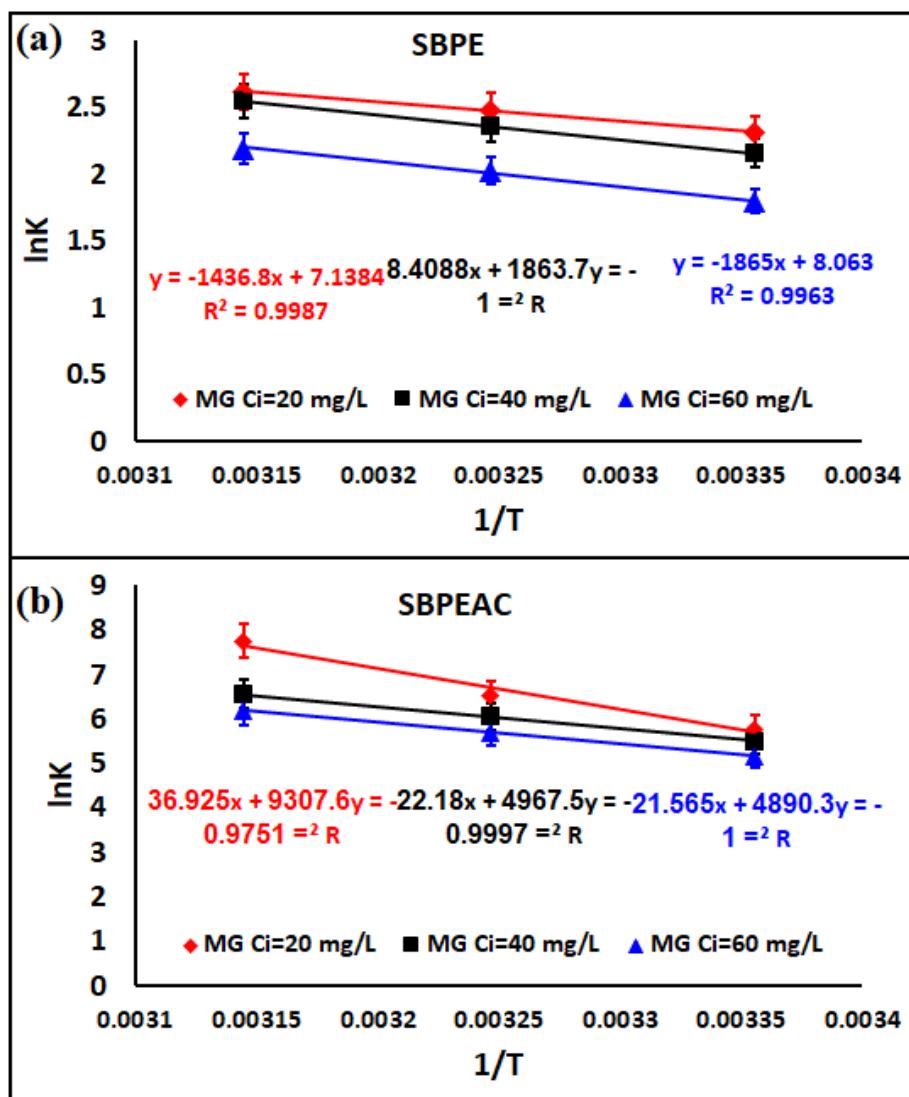

**Figure S4.** Van't Hoff plots for MG adsorption on SBPE (a), and SBPEAC (b) composites.



## References

63. Wallis ,A.; Dollard, M.F. Local and global factors in work stress—The Australian dairy farming exemplar. *Scand. J. Work. Environ. Health Suppl.* **2008**, *34*, 66–74.
64. Freundlich, H. Über die Adsorption in Lösungen. *Zeitschrift Phys. Chemie* **1907**, *57U*, 385–470. <https://doi.org/10.1515/zpch-1907-5723>.
65. Dubinin, M.M. The Equation of the Characteristic Curve of Activated Charcoal. *Proc. Acad. Sci. Phys. Chem. Sect.* **1947**, *55*, 331.
69. Lagergren, S. About the theory of so-called adsorption of soluble substances. *Handlingar* **1898**, *24*, 1–39.
70. Chien, S.H.; Clayton, W.R. The catalytic oxidation of carbon monoxide on manganese dioxide. *Sci. Soc. Am. J.* **1980**, *44*, 265–268.
